# Supplementary material for: Coflowing aqueous and oil-based ferrofluid streams exposed to a magnetic field
Source: Royal Society of Chemistry journal article supplement (doi:10.1039/d4sm00550c), 2024-01-01
Supplement: d4sm00550c1.pdf [file d4sm00550c1.pdf]

## Supplementary Information

### Coflowing aqueous and oil-based ferrofluid streams exposed to a magnetic field

S. K. Jain, A. K. Sen\*

Micro Nano Bio Fluidics Unit, Department of Mechanical Engineering, Indian Institute of Technology Madras, Chennai  
– 600036, Tamil Nadu, India

\*Corresponding Author: [ashis@iitm.ac.in](mailto:ashis@iitm.ac.in)

#### S1. Properties of the liquids used in the experiments

##### The properties of the aqueous glycerol (glycerol+DI water):

| Fluid            | DI water: Glycerol<br>%(v/v) | Density<br>(kg m <sup>-3</sup> ) | Viscosity (mPa s) |
|------------------|------------------------------|----------------------------------|-------------------|
| Aqueous glycerol | 1:1                          | 1139                             | 6.43              |
|                  | 2:1                          | 1099                             | 2.96              |
|                  | 9:1                          | 1025                             | 1.52              |

##### The properties of oil-based ferrofluid:

| Fluid      | Concentration<br>%(v/v) | Density<br>(kg m <sup>-3</sup> ) | Viscosity (mPa s) |
|------------|-------------------------|----------------------------------|-------------------|
| Ferrofluid | 2%                      | 892                              | 28.8              |
|            | 5%                      | 1098                             | 36.1              |

##### The interfacial tension between the different fluid combinations:

| DI water: Glycerol | Oil-based Ferrofluid | IFT (mN m <sup>-1</sup> ) |
|--------------------|----------------------|---------------------------|
| 1:1                | 2%                   | 27.3                      |
| 2:1                | 2%                   | 24.1                      |
| 9:1                | 2%                   | 19.7                      |
| 1:1                | 5%                   | 13.4                      |
| 2:1                | 5%                   | 15.5                      |
| 9:1                | 5%                   | 23.8                      |

## S2. Calculation of the timescales

The transition between the different flow regimes can also be explained in terms of the relevant timescales: magnetic pinching timescale, which we define as  $t_{mp} \sim (\gamma W / \nu \mu_0 H^2)$  and advection timescale,  $t_{ad} \sim (W / U_2)$ . The advection timescale  $t_{ad}$  is calculated from the channel width  $W$  and the average flow velocity of the aqueous phase,  $U_2$ . The magnetophoretic timescale is estimated using the values of the interfacial tension ( $\gamma$ ), channel width  $W$ , kinematic viscosity of the aqueous phase ( $\nu$ ), magnetic permeability of free space ( $\mu_0$ ), and magnetic field intensity ( $H$ ).

Case I:

For smaller  $Bo_m = 20$  and  $Ca_r = 2.6$ , we find that the magnetic pinching timescale is much longer than the advection timescale,  $t_{mp} > t_{ad}$ . The liquid properties and operating conditions for calculating the  $t_{mp}$  and  $t_{ad}$  in this regime are given as follows: interfacial tension,  $\gamma = 24.1$  mN/m, channel width,  $W = 300$   $\mu\text{m}$ , the average flow velocity of the aqueous phase,  $U_2 = 0.02$  m/s, kinematic viscosity of the aqueous phase,  $\nu = 3 \times 10^{-6}$  m<sup>2</sup>/s, magnetic permeability of free space,  $\mu_0 = 4\pi \times 10^{-7}$  N/A<sup>2</sup>, and magnetic field intensity,  $H = 2950$  A/m.

We calculate the  $t_{mp} \sim 0.223$  s and  $t_{ad} \sim 0.015$  s.

Case II:

For smaller  $Bo_m = 30$  but a higher  $Ca_r = 7$ , we get a magnetic pinching timescale which is of the same order as that of the advection timescale,  $t_{mp} \sim t_{ad}$ . The liquid properties and operating conditions for calculating the  $t_{mp}$  and  $t_{ad}$  in this regime are given as follows: interfacial tension,  $\gamma = 24.1$  mN/m, channel width,  $W = 300$   $\mu\text{m}$ , the average flow velocity of the aqueous phase,  $U_2 = 0.01$  m/s, kinematic viscosity of the aqueous phase,  $\nu = 3 \times 10^{-6}$  m<sup>2</sup>/s, magnetic permeability of free space,  $\mu_0 = 4\pi \times 10^{-7}$  N/A<sup>2</sup>, and magnetic field intensity,  $H = 7521$  A/m.

We calculate the  $t_{mp} \sim 0.034$  s and  $t_{ad} \sim 0.030$  s.

Case III:

At a higher  $Bo_m$  and  $Ca_r$ , we find that the magnetic pinching timescale is smaller than the advection timescale,  $t_{mp} < t_{ad}$ . The liquid properties and operating conditions for calculating the  $t_{mp}$  and  $t_{ad}$  in this regime are given as follows: interfacial tension,  $\gamma = 24.1$  mN/m, channel width,  $W = 300$   $\mu\text{m}$ , the average flow velocity of the aqueous phase,  $U_2 = 0.005$  m/s, kinematic viscosity of the aqueous phase,  $\nu = 3 \times 10^{-6}$  m<sup>2</sup>/s, magnetic permeability of free space,  $\mu_0 = 4\pi \times 10^{-7}$  N/A<sup>2</sup>, and magnetic field intensity,  $H = 15545$  A/m.

We calculate the  $t_{mp} \sim 0.008$  s and  $t_{ad} \sim 0.060$  s.
